# Supplementary material for: Impact of stress on cardiac phenotypes in mice harboring an ankyrin-B disease variant
Source: PubMed Central journal article supplement (PMC10318515; doi:10.1016/j.jbc.2023.104818), 2023-05-12
Supplement: mmc1.pdf [file mmc1.pdf]

## Supporting Information

### Impact of stress on cardiac phenotypes in mice harboring an ankyrin-B disease variant

Michael J. Wallace<sup>1,2</sup>, Nipun Malhotra<sup>1,3</sup>, Juan Ignacio Elio Mariángelo<sup>1,2</sup>, Tyler L. Stevens<sup>1,2</sup>, Lindsay J. Young<sup>1</sup>, Steve Antwi-Boasiako<sup>1</sup>, Danielle Abdallah<sup>1</sup>, Sarah Sumie Takenaka<sup>1</sup>, Omer Cavus<sup>1</sup>, Nathaniel P. Murphy<sup>1</sup>, Mei Han<sup>1</sup>, Xianyao Xu<sup>1</sup>, Matteo E. Mangoni<sup>4</sup>, Thomas J. Hund<sup>1,5,6</sup>, Jason D. Roberts<sup>7</sup>, Sandor Györke<sup>1,2</sup>, Peter J. Mohler<sup>1,2,6</sup> and Mona El Refaey<sup>1,3\*</sup>

<sup>1</sup>The Frick Center for Heart Failure and Arrhythmia, Dorothy M. Davis Heart and Lung Research Institute, <sup>2</sup>Department of Physiology and Cell Biology, <sup>3</sup>Department of Surgery/Division of Cardiac Surgery, The Ohio State University, Columbus, OH, USA.

<sup>4</sup>Institut de Génomique Fonctionnelle, Université de Montpellier, CNRS, INSERM, Montpellier, France.

<sup>5</sup>Department of Biomedical Engineering, College of Engineering, The Ohio State University, Columbus, Ohio, USA.

<sup>6</sup>Department of Internal Medicine/Division of Cardiovascular Medicine, The Ohio State University, Columbus, OH, USA.

<sup>7</sup>Population Health Research Institute, McMaster University, and Hamilton Health Sciences, Hamilton, Ontario, Canada.

**Running Title: Impact of stress on the penetrance of ankyrin-B syndrome**

**\*Address correspondence to**

Mona El Refaey, PhD, MS

Department of Surgery/Division of Cardiac Surgery

The Dorothy M. Davis Heart and Lung Research Institute

The Ohio State University College of Medicine and Wexner Medical Center

333 West 10<sup>th</sup> Avenue, Columbus, OH, 43210

[Mona.elrefaey@osumc.edu](mailto:Mona.elrefaey@osumc.edu)

Tel: 614-366-2748

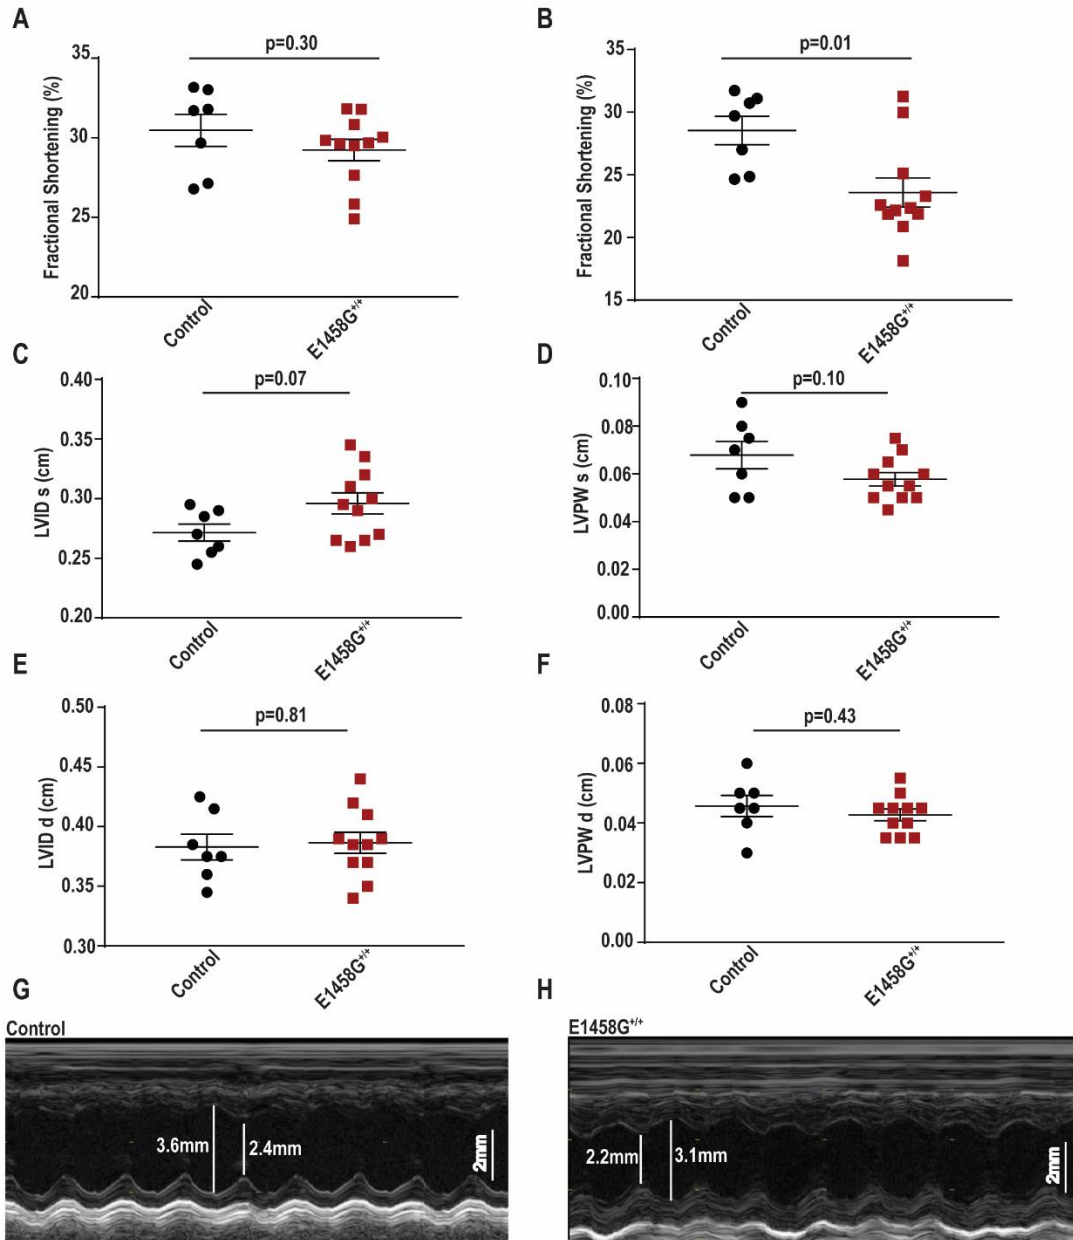

**Suppl. Figure 1. AnkBp.E1458G<sup>+/+</sup> mice do not display an early structural phenotype.** **A.** Control and AnkBp.E1458G<sup>+/+</sup> mice do not display changes in fractional shortening around three months of age (Con, N=7 and AnkBp.E1458G<sup>+/+</sup>, N=11). Data passed Shapiro-Wilk normality test and unpaired t-test was performed. **B.** AnkBp.E1458G<sup>+/+</sup> mice display a significant reduction in fractional shortening around six months of age (Con, N=7 and AnkBp.E1458G<sup>+/+</sup>, N=11). Data passed Shapiro-Wilk normality test and unpaired t-test was performed. **C-D** AnkBp.E1458G<sup>+/+</sup> mice display a trending increase in left ventricle internal diameter (LVID) and a trending decrease in left ventricle posterior wall (LVPW) during systole around six months of age (Con, N=7 and AnkBp.E1458G<sup>+/+</sup>, N=11). Data passed Shapiro-Wilk normality tests and unpaired t-tests were performed. **E-F.** No significant changes in the left ventricle internal diameter (LVID)

and left ventricle posterior wall thickness (LVPW) during diastole around six months of age (Con, N=7 and AnkBp.E1458G<sup>+/+</sup>, N=11). Data passed Shapiro-Wilk normality tests and unpaired t-tests were performed. **G-H.** Representative echocardiographs denoting no changes in cardiac function in the mice carrying the human AnkBp.E1458G variant and the control littermates around three months of age (Con, N=7 and AnkBp.E1458G<sup>+/+</sup>, N=11), Scale bars equal 2mm.

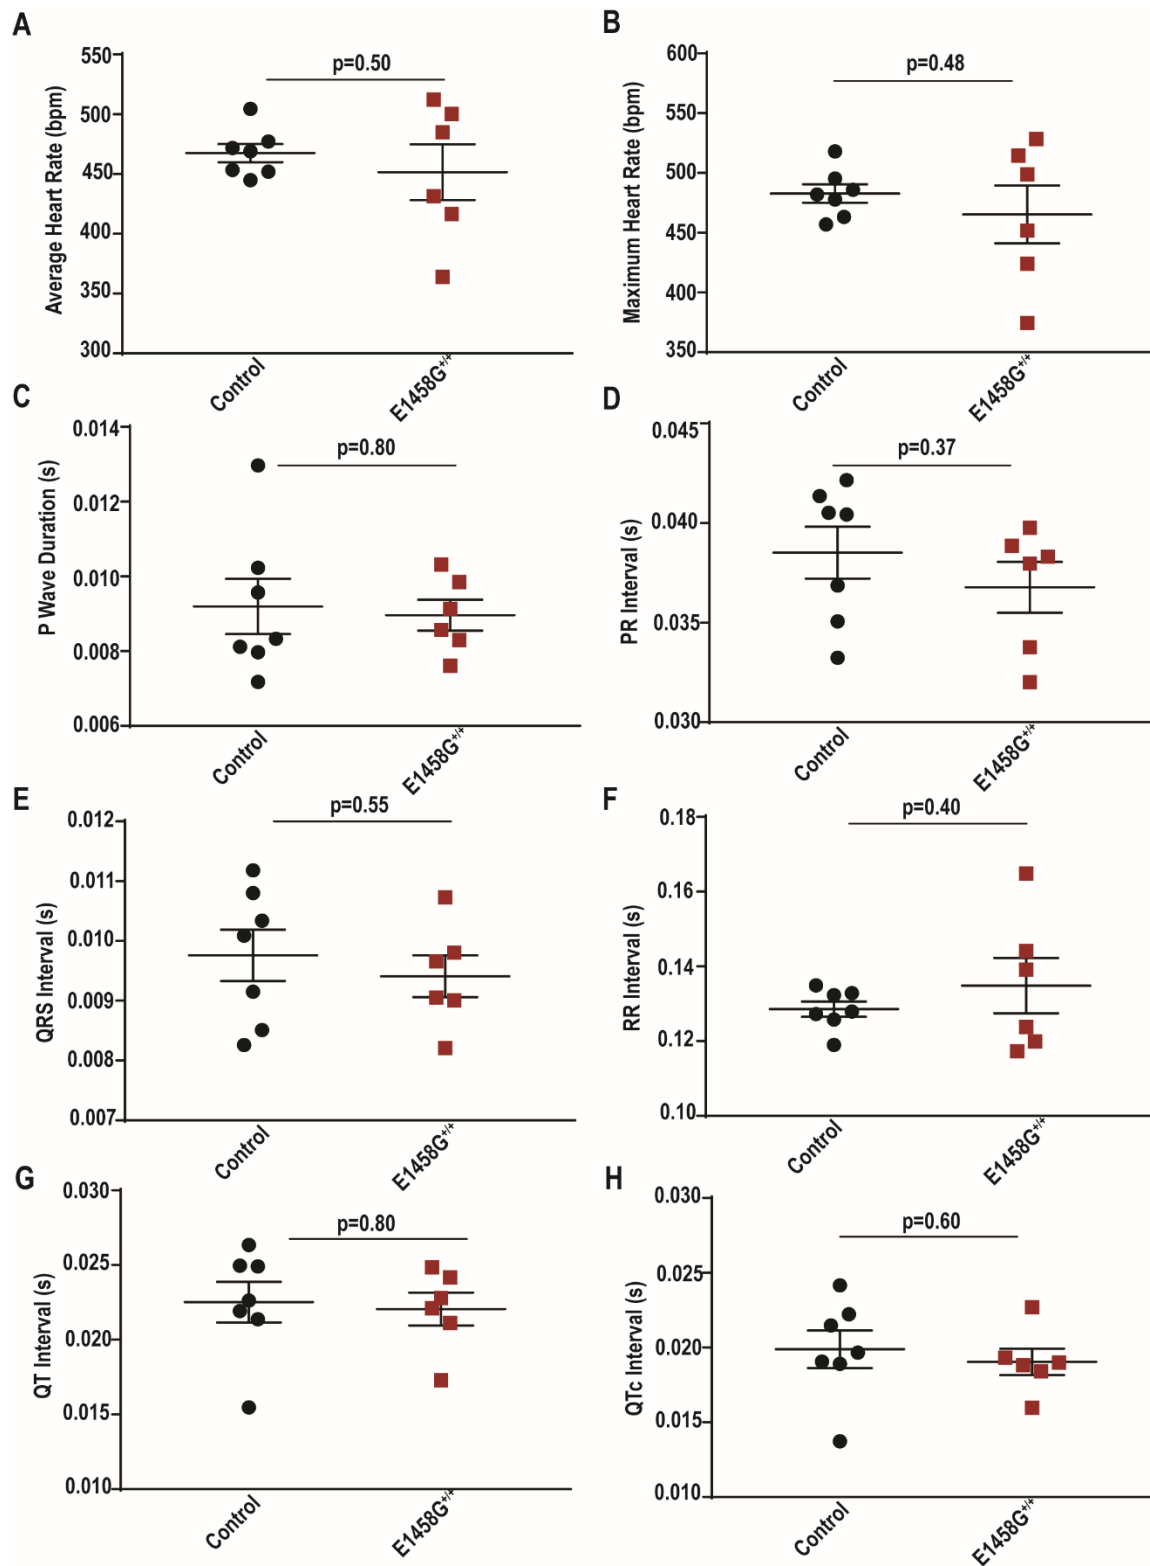

Suppl. Figure 2. AnkBp.E1458G<sup>+/+</sup> mice do not display electrical changes in subsurface ECG around three months of age. **A.** Average Heart rate, **B.** Maximal heart

rate, **C.** P Wave Duration, **D.** PR Interval, **E.** QRS Interval, **F.** RR Interval, **G.** QT Interval and **H.** QTc (Mitchell) (Con, N=7 and AnkBp.E1458G<sup>+/+</sup>, N=6). All data passed Shapiro-Wilk normality tests and unpaired t-tests were performed.

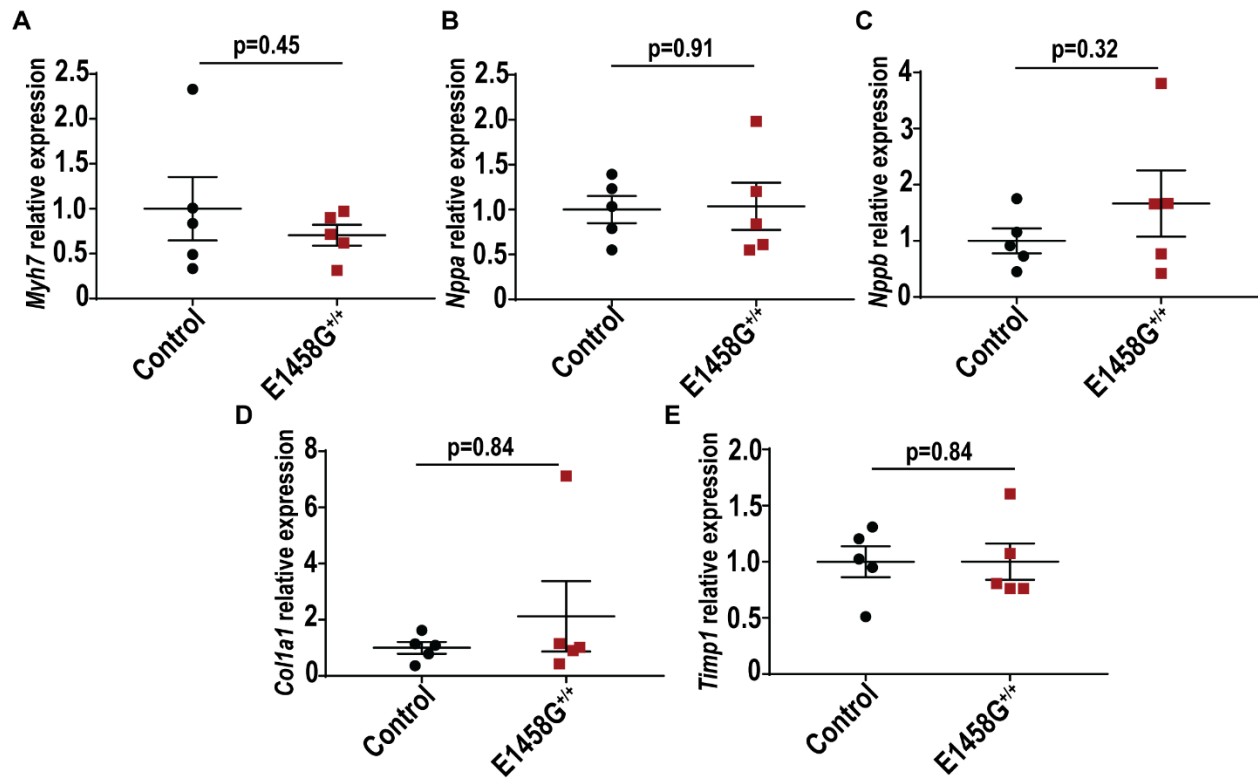

**Suppl. Figure 3.** No changes in hypertrophic gene expression markers; (A) myosin heavy chain 7 (*Myh7*), (B) atrial natriuretic peptide (*Nppa*), (C) brain natriuretic peptide (*Nppb*), (D) Collagen type I alpha 1 chain (*Col1a1*) and (E) Tissue inhibitor matrix metalloproteinase 1 (*Timp1*) in WT and AnkBp.E1458G<sup>+/+</sup> mice at ~six months of age (N=5/ genotype). Data passed Shapiro-Wilk normality tests and unpaired t-tests were performed (A-C). Data did not pass Shapiro-Wilk normality tests and Mann-Whitney tests were performed (D-E).

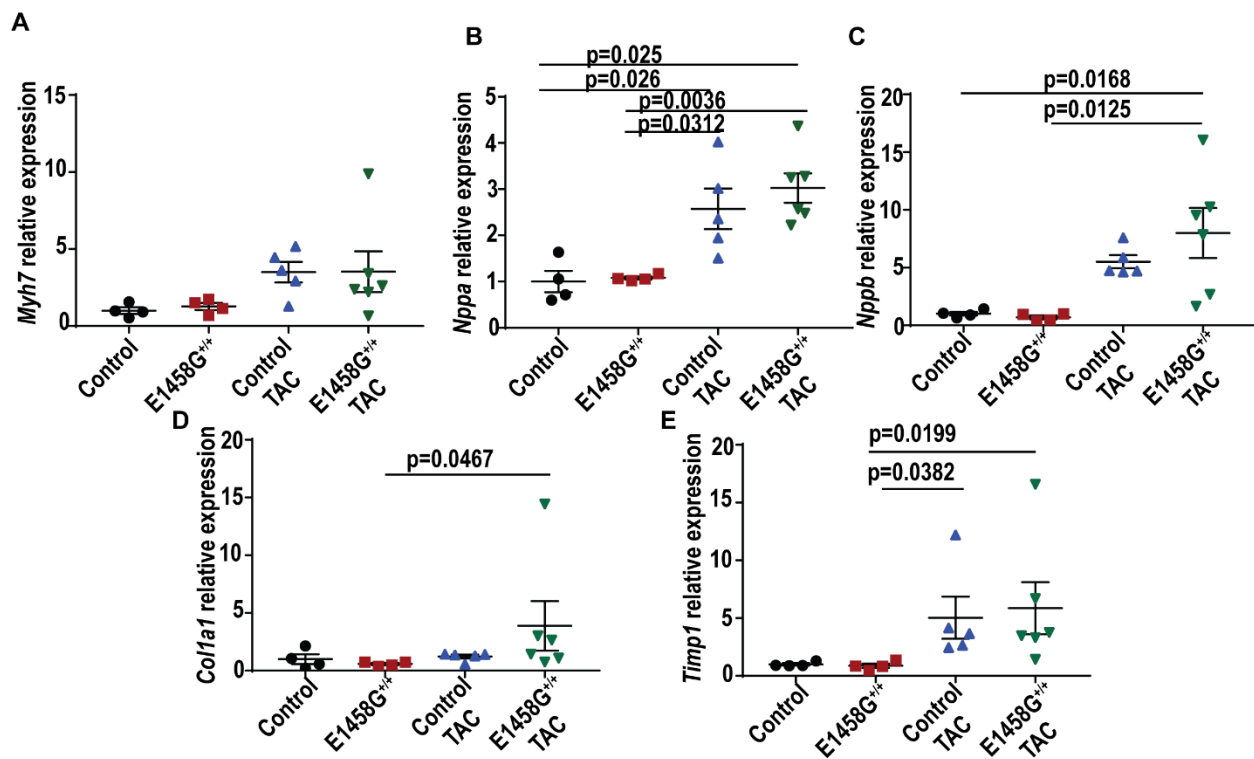

**Suppl. Figure 4.** Hypertrophic gene expression markers: (A) myosin heavy chain 7 (*Myh7*), data did not pass Shapiro-Wilk normality test and Kruskal-Wallis test was performed followed by Dunn's multiple comparisons test. (B) atrial natriuretic peptide (*Nppa*), data passed Shapiro-Wilk normality test and ANOVA test was performed followed by Tukey's multiple comparisons test. (C) brain natriuretic peptide (*Nppb*), data passed Shapiro-Wilk normality test and ANOVA test was performed followed by Tukey's multiple comparisons test. (D) Collagen type I alpha 1 chain (*Col1a1*), data did not pass Shapiro-Wilk normality test and Kruskal-Wallis test was performed followed by Dunn's multiple comparisons and (E) Tissue inhibitor matrix metalloproteinase 1 (*Timp1*), data did not pass Shapiro-Wilk normality test and Kruskal-Wallis test was performed followed by Dunn's multiple comparisons test. WT and AnkBp.E1458G<sup>+/+</sup> hearts were used at baseline (~2-3 months of age) and 4 weeks post TAC (N=4-5/group).



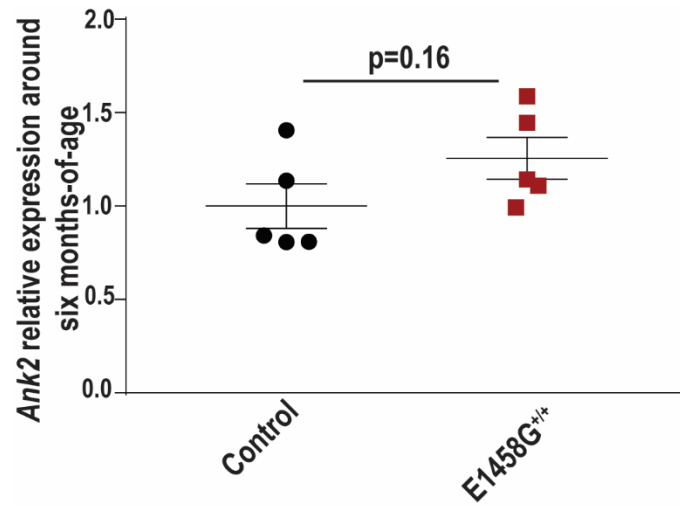

**Suppl. Figure 5.** *Ank2* relative expression in control and AnkBp.E1458G<sup>+/+</sup> mice around six months of age (N=5 mice/genotype). Data passed Shapiro-Wilk normality test and unpaired t-test was performed.

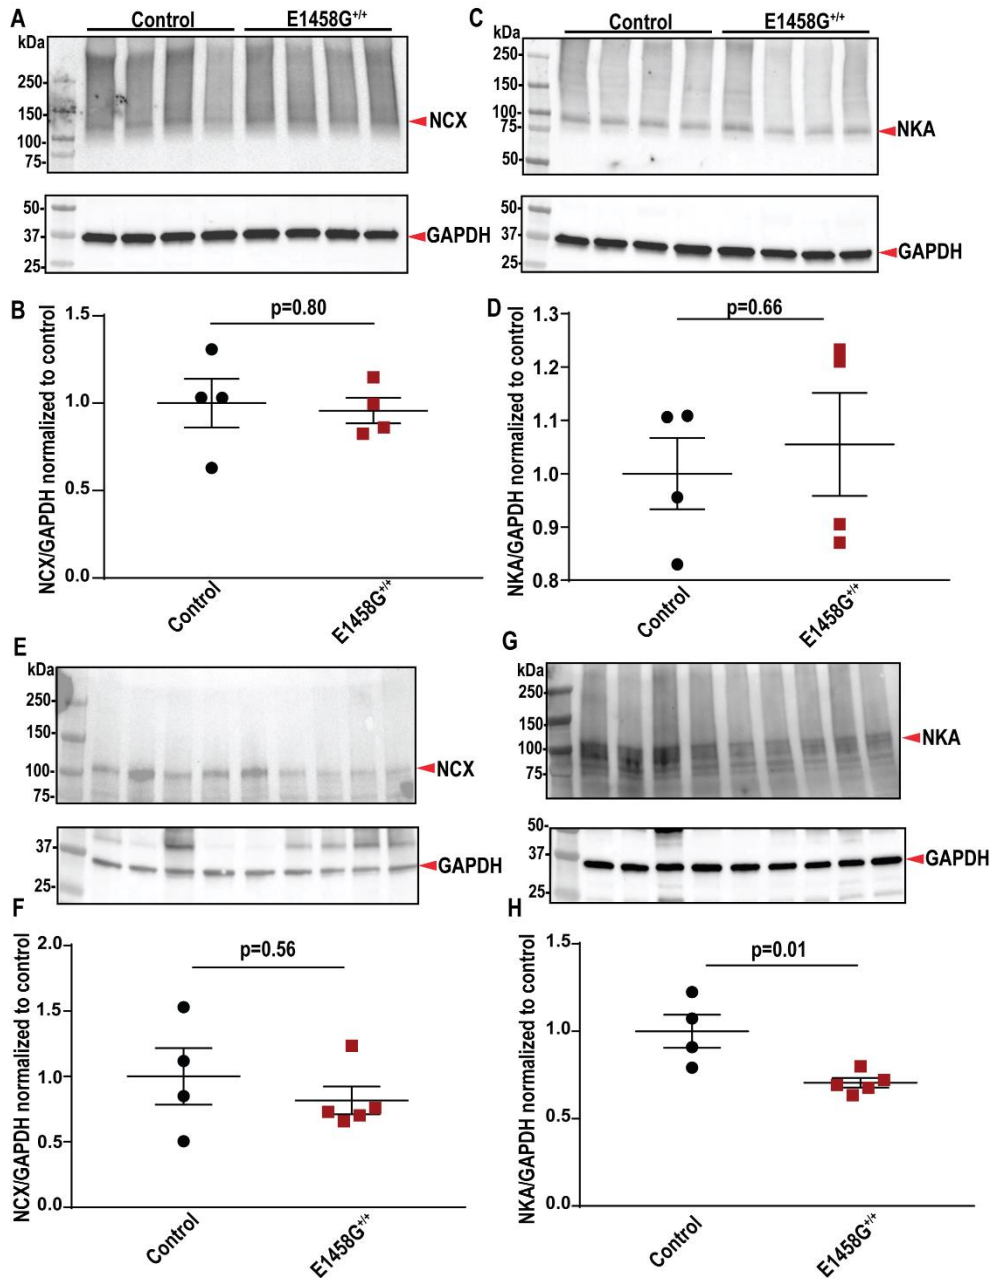

**Suppl. Figure 6. Expression of ankyrin-B and ankyrin membrane partners in the AnkBp.E1458G<sup>+/+</sup> heart lysates in young mice at baseline (A-D) and 4 weeks post TAC (E-H).** **A-B.** Immunoblotting and quantitative analysis of Na<sup>+</sup>/Ca<sup>2+</sup> exchanger (NCX) normalized to GAPDH. **C-D.** Immunoblotting and quantitative analysis of Na<sup>+</sup>, K<sup>+</sup>-ATPase (NKA) normalized to GAPDH. Data passed Shapiro-Wilk normality tests and unpaired t-test were performed (B-D). **E-F.** Immunoblotting and quantitative analysis of Na<sup>+</sup>/Ca<sup>2+</sup> exchanger (NCX) normalized to GAPDH (data did not pass Shapiro-Wilk normality test and Mann-Whitney test was performed). **G-H.** Immunoblotting and quantitative analysis of Na<sup>+</sup>, K<sup>+</sup>-ATPase (NKA) normalized to GAPDH (data passed Shapiro-Wilk normality test and unpaired t-test was performed). Con and AnkBp.E1458G<sup>+/+</sup>, N=4.

## AnkG Antibody Validation

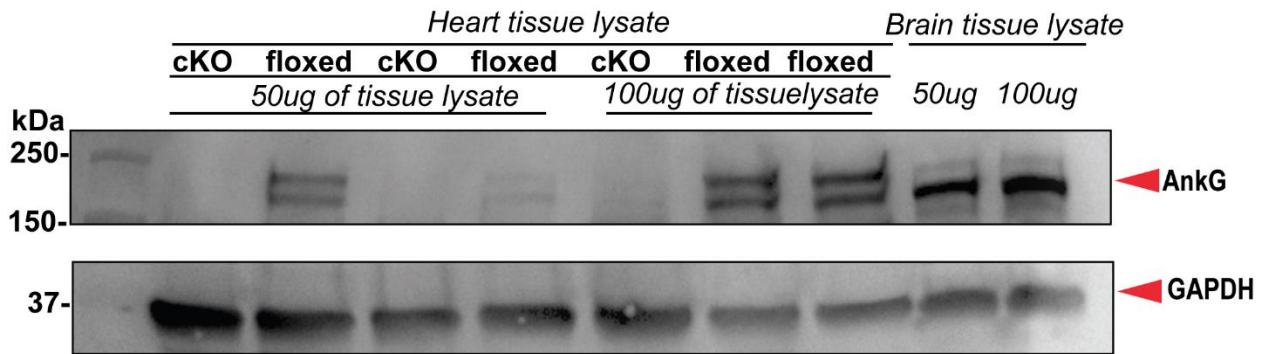

*Ank3*-floxed and cardiac specific knockout (cKO) mice

**Suppl. Figure 7.** Validation of AnkG antibody using floxed and *Ank3*-cardiac specific Knockout (KO).

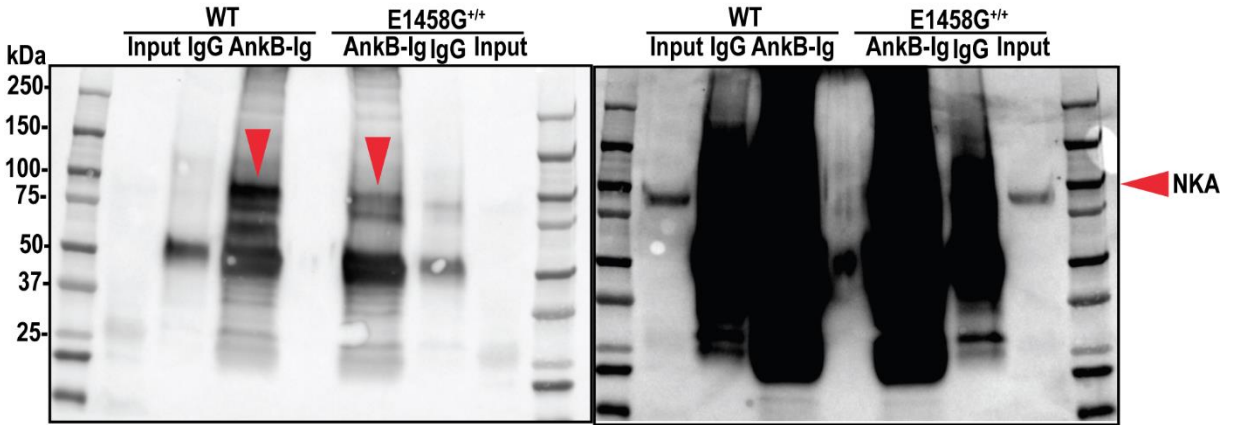

**Suppl. Figure 8.** Immunoprecipitation experiments illustrating the interaction between AnkB-Ig or IgG control and NKA using control and AnkBp.E1458G<sup>+/+</sup> lysates. Data are representative of experiments repeated three times.

**Suppl. Table 1.** Summary of echocardiographic parameters in control and the AnkBp.E1458G<sup>+/+</sup> mice at ~ six months of age.

| Mouse                    | Ejection Fraction (%) | Fractional Shortening (%) | LVIDs (cm) | LVIDd (cm) | LVPWs (cm) | LVPWd (cm) | IVSs (cm) | IVSd (cm) |
|--------------------------|-----------------------|---------------------------|------------|------------|------------|------------|-----------|-----------|
| E1458G <sup>+/+</sup> 1  | 51.355                | 22.155                    | 0.29       | 0.37       | 0.075      | 0.055      | 0.055     | 0.05      |
| E1458G <sup>+/+</sup> 2  | 51.675                | 22.355                    | 0.3        | 0.385      | 0.05       | 0.05       | 0.075     | 0.06      |
| E1458G <sup>+/+</sup> 3  | 43.64                 | 18.15                     | 0.345      | 0.42       | 0.045      | 0.035      | 0.055     | 0.035     |
| E1458G <sup>+/+</sup> 4  | 65.985                | 31.25                     | 0.265      | 0.385      | 0.065      | 0.045      | 0.065     | 0.045     |
| E1458G <sup>+/+</sup> 5  | 48.97                 | 20.87                     | 0.31       | 0.39       | 0.06       | 0.035      | 0.055     | 0.035     |
| E1458G <sup>+/+</sup> 6  | 52.19                 | 22.585                    | 0.27       | 0.35       | 0.05       | 0.045      | 0.055     | 0.04      |
| E1458G <sup>+/+</sup> 7  | 56.455                | 25.115                    | 0.295      | 0.39       | 0.055      | 0.035      | 0.06      | 0.045     |
| E1458G <sup>+/+</sup> 8  | 64.195                | 29.975                    | 0.26       | 0.37       | 0.07       | 0.045      | 0.06      | 0.045     |
| E1458G <sup>+/+</sup> 9  | 53.12                 | 23.285                    | 0.335      | 0.44       | 0.06       | 0.045      | 0.055     | 0.035     |
| E1458G <sup>+/+</sup> 10 | 50.79                 | 21.9                      | 0.32       | 0.41       | 0.055      | 0.04       | 0.05      | 0.045     |
| E1458G <sup>+/+</sup> 11 | 50.92                 | 21.88                     | 0.265      | 0.34       | 0.05       | 0.04       | 0.04      | 0.04      |
| Control 1                | 66.715                | 31.73                     | 0.245      | 0.36       | 0.09       | 0.06       | 0.05      | 0.05      |
| Control 2                | 59.595                | 27.005                    | 0.27       | 0.375      | 0.05       | 0.03       | 0.06      | 0.04      |
| Control 3                | 63.62                 | 29.705                    | 0.295      | 0.425      | 0.06       | 0.04       | 0.07      | 0.055     |
| Control 4                | 65.12                 | 30.725                    | 0.285      | 0.415      | 0.08       | 0.045      | 0.08      | 0.05      |
| Control 5                | 56.205                | 24.86                     | 0.26       | 0.345      | 0.05       | 0.045      | 0.055     | 0.045     |
| Control 6                | 55.73                 | 24.665                    | 0.29       | 0.385      | 0.07       | 0.05       | 0.065     | 0.035     |
| Control 7                | 65.83                 | 31.09                     | 0.255      | 0.375      | 0.075      | 0.05       | 0.06      | 0.04      |

**Suppl. Table 2.** Summary of electrocardiographic parameters using implanted radio-telemeters in control and the AnkBp.E1458G<sup>+/+</sup> mice around six months of age.

| Mouse                    | Min HR (BPM) | Max HR (BPM) | RR Interval (S) | HR (BPM) | PR Interval (S) | P Duration (S) | QRS Interval (S) | QT Interval (S) | QTc (S) |
|--------------------------|--------------|--------------|-----------------|----------|-----------------|----------------|------------------|-----------------|---------|
| E1458G <sup>+/+</sup> 1  | 596.1        | 678.6        | 0.09562         | 627.9    | 0.03699         | 0.008297       | 0.00962          | 0.02357         | 0.02412 |
| E1458G <sup>+/+</sup> 2  | 503.1        | 663.9        | 0.1062          | 568      | 0.03635         | 0.009818       | 0.009136         | 0.02326         | 0.02262 |
| E1458G <sup>+/+</sup> 3  | 463.9        | 577.9        | 0.1191          | 505.6    | 0.03878         | 0.01005        | 0.009507         | 0.02065         | 0.01897 |
| E1458G <sup>+/+</sup> 4  | 467.2        | 631.5        | 0.1105          | 545      | 0.03449         | 0.008551       | 0.01122          | 0.02524         | 0.02391 |
| E1458G <sup>+/+</sup> 5  | 420.7        | 623.4        | 0.1275          | 473.4    | 0.03608         | 0.009651       | 0.01206          | 0.02509         | 0.02224 |
| E1458G <sup>+/+</sup> 6  | 527          | 716.7        | 0.09559         | 630      | 0.03547         | 0.009153       | 0.008932         | 0.02064         | 0.02116 |
| E1458G <sup>+/+</sup> 7  | 498.4        | 700.7        | 0.1014          | 596.9    | 0.032           | 0.01118        | 0.009545         | 0.01978         | 0.01975 |
| E1458G <sup>+/+</sup> 8  | 527.1        | 759.8        | 0.0862          | 700.3    | 0.0327          | 0.008767       | 0.009745         | 0.02432         | 0.02635 |
| E1458G <sup>+/+</sup> 9  | 361.1        | 736.8        | 0.09929         | 612.9    | 0.02713         | 0.00507        | 0.01076          | 0.02462         | 0.02478 |
| E1458G <sup>+/+</sup> 10 | 577.6        | 706.5        | 0.09337         | 644.3    | 0.03233         | 0.008422       | 0.009906         | 0.02347         | 0.02433 |
| Control 1                | 599.2        | 724.3        | 0.08939         | 672      | 0.03034         | 0.009515       | 0.009764         | 0.0212          | 0.02243 |
| Control 2                | 420.6        | 669.2        | 0.1032          | 590.1    | 0.03342         | 0.00959        | 0.009573         | 0.02237         | 0.02221 |
| Control 3                | 530.8        | 775.1        | 0.08389         | 717.9    | 0.03063         | 0.007569       | 0.008603         | 0.02102         | 0.023   |
| Control 4                | 573.7        | 722.7        | 0.08965         | 670.6    | 0.03191         | 0.008708       | 0.009684         | 0.01716         | 0.01818 |
| Control 5                | 602.6        | 743.6        | 0.09042         | 665.2    | 0.03293         | 0.008028       | 0.009291         | 0.02106         | 0.02218 |
| Control 6                | 479.1        | 712.5        | 0.09673         | 626.6    | 0.03455         | 0.007702       | 0.007723         | 0.02193         | 0.02241 |
| Control 7                | 551.6        | 757.7        | 0.09011         | 668.8    | 0.03038         | 0.0085         | 0.01287          | 0.01948         | 0.02065 |
